# Supplementary material
Source: PubMed Central journal article supplement (PMC2888245)
Supplement: 01084.2009_1.pdf [file 01084.2009_1.pdf]

12 **Supplementary Figure 1**

13 Example Fourier phase transition from a single house image to a single face image.

14 Numbers above each image indicate the proportion of “face” phase in the stimulus. In  
15 the experiment, stimuli were created from a face and house randomly drawn from the  
16 total image set on each trial, with a possible 15 levels spanning 0 – 100% face.

17

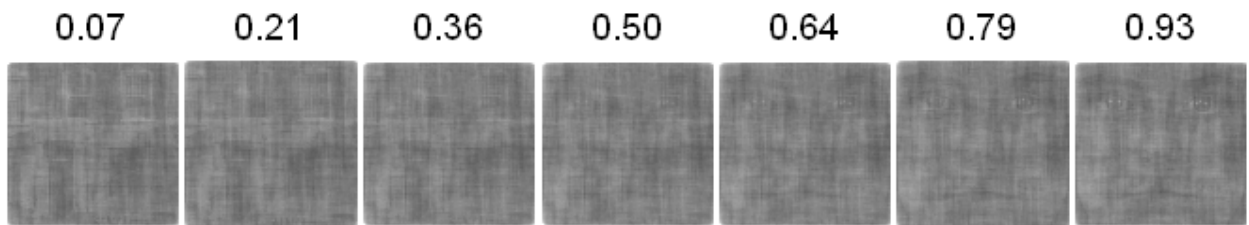

18

19 **Supplementary Figure 2**

20 Individual subject choice probability data from the psychophysics session (1260 trials)  
 21 and fMRI experiment (420 trials). On each figure, the abscissa represents the proportion  
 22 of face phase in the image, and the ordinate the proportion of “face” responses to that  
 23 stimulus in the different cost conditions. Blue = face value; green = neutral value; red =  
 24 house value.

### Psychophysics

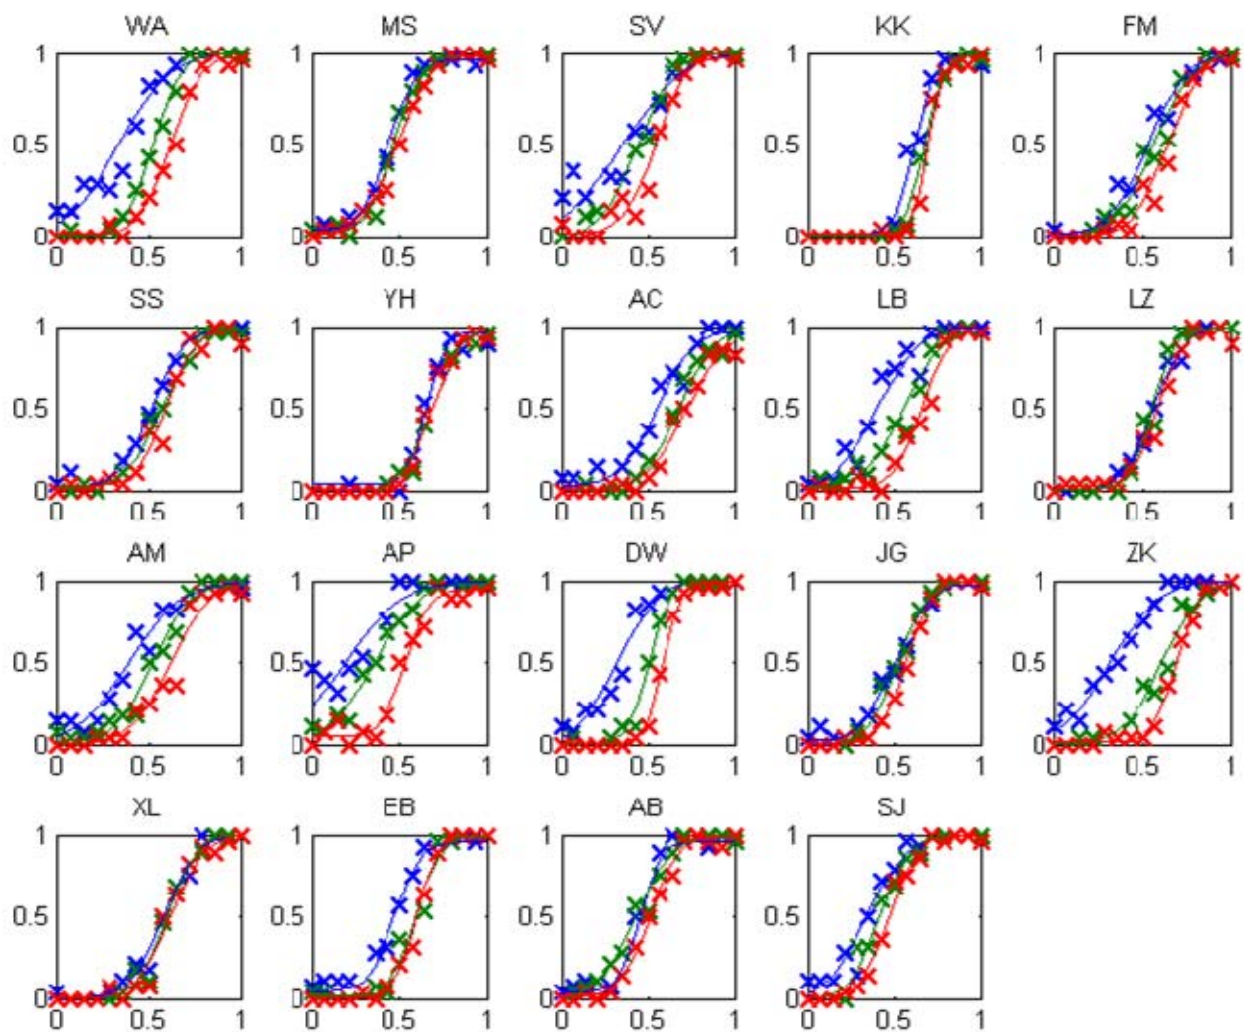

**In-scanner**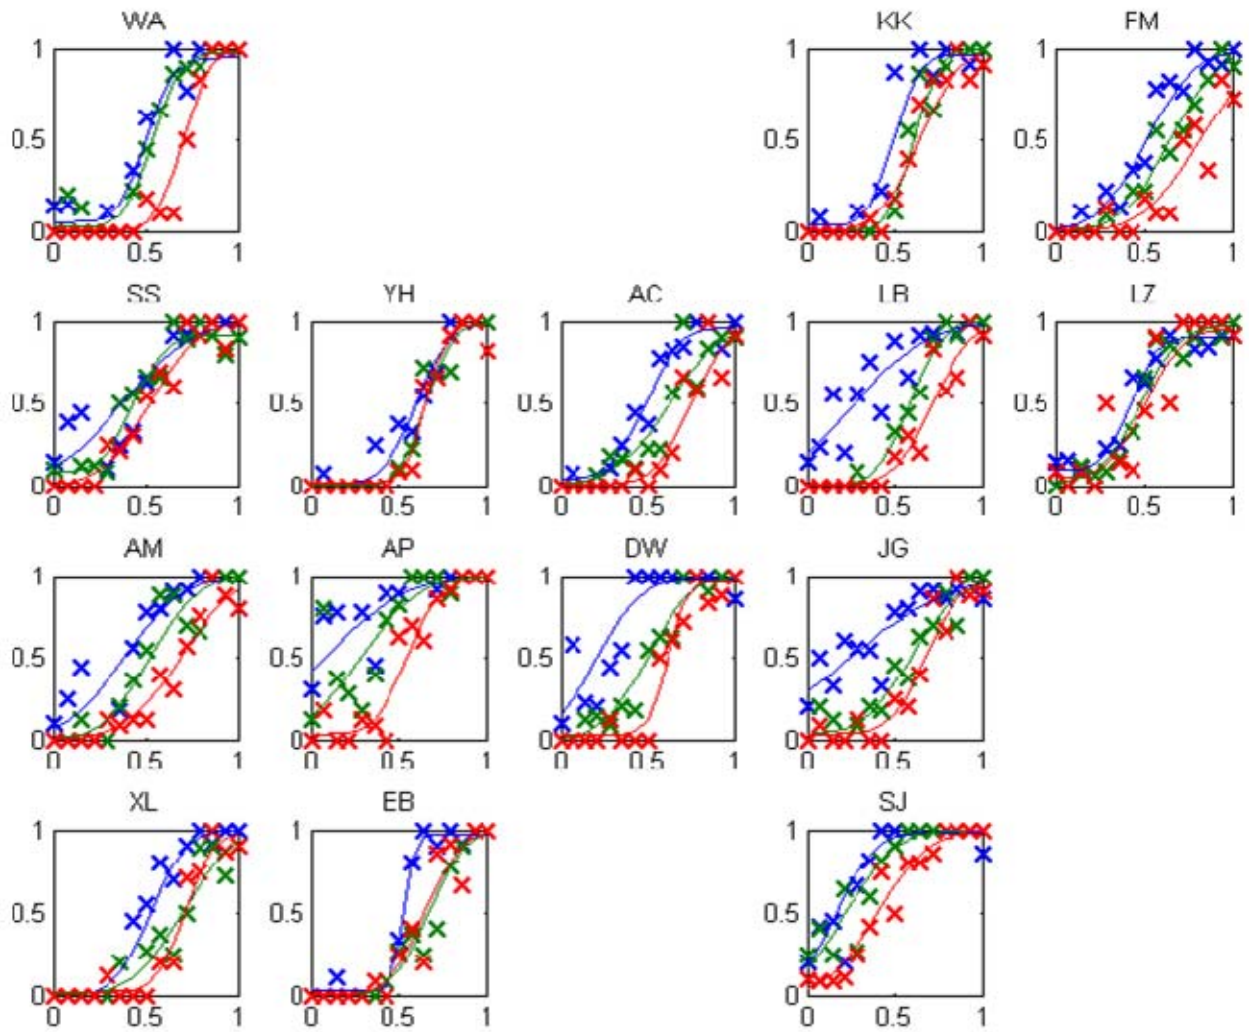

25

26

27 **Supplementary Figure 3**

28 Mean reaction times from **(a)** psychophysics and **(b)** the fMRI experiment, as a function  
29 of both cost condition and stimulus phase. Blue = face value; green = neutral value; red  
30 = house value.

31 **(a)**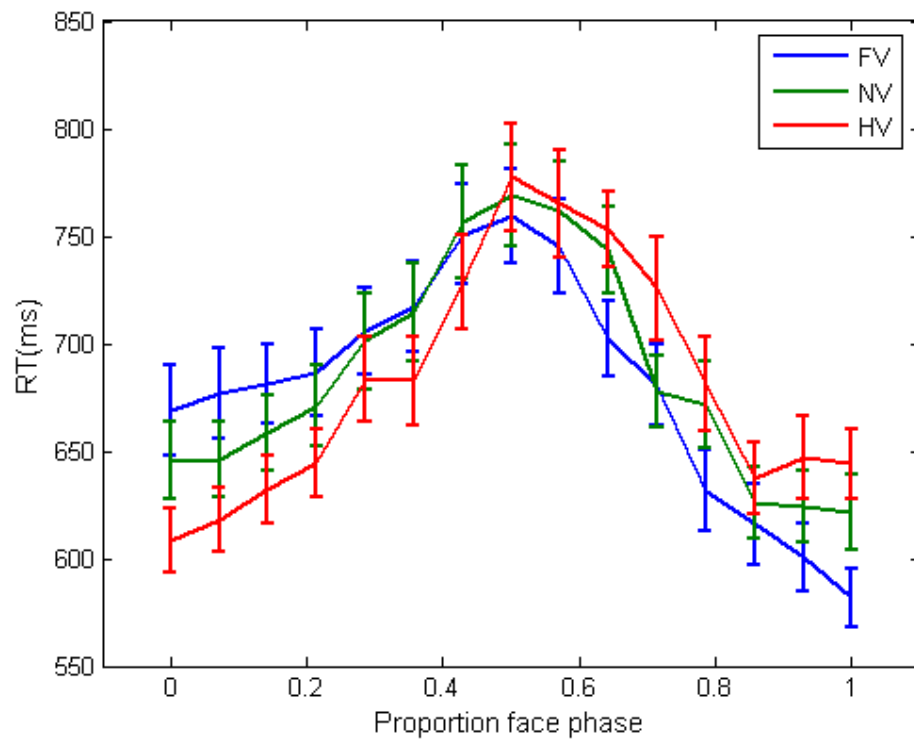

32

33

34 (b)

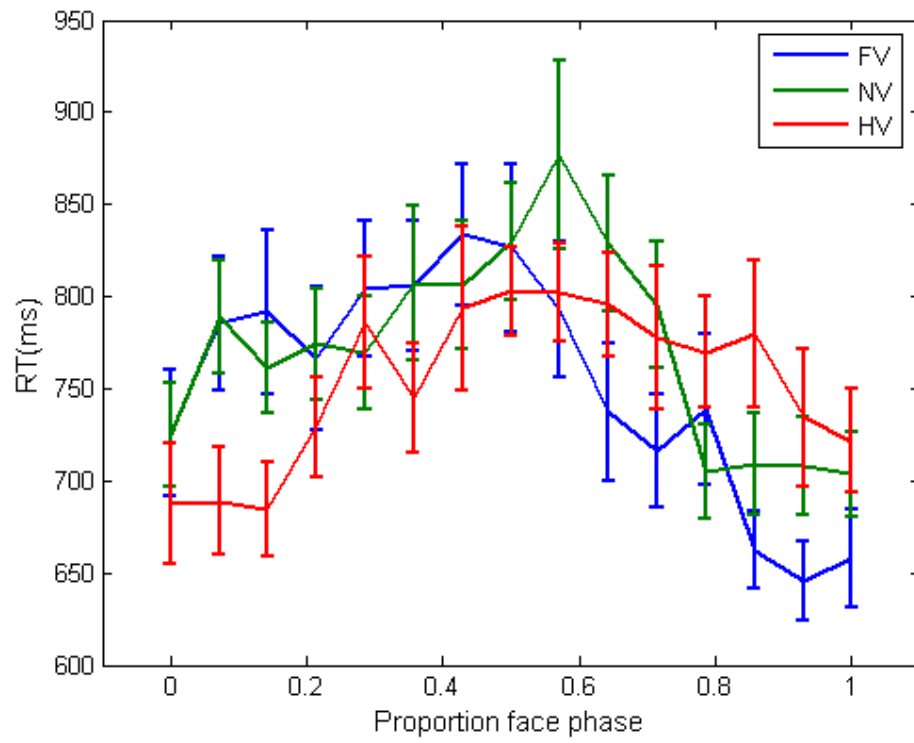

35

36 **Supplementary Figure 4**

37 Brain activations correlating with wins (negative losses) at each feedback screen (red),  
38 and increases in categorical certainty (blue). Saggital ( $x = -3$ ) and coronal ( $y = 11$ )  
39 sections show clusters in ventromedial prefrontal cortex (vmPFC), [MNI coordinates ( $x$ ,  
40  $y$ ,  $z$ ),  $-3, 42, 30$  (peak Z-score = 4.65); and left ventral striatum (VS):  $-9, 9, -3$  (Z-score  
41 = 3.93) correlated with increasing wins. An adjacent region of vmPFC responded  
42 strongly to increases in categorical certainty. Also significantly activated for increasing  
43 wins was a cluster in left cerebellum,  $30, -81, -30$  (Z-score = 4.10), not visible on the  
44 displayed sections.

45

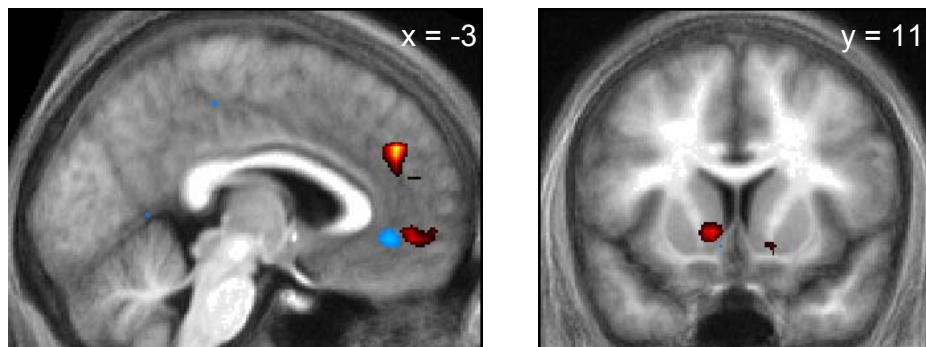

46

47

48

49

50

51

52

53

54 **Supplementary Figure 5**

55 Due to the subtle variations in decision time across both stimulus and cost factors  
 56 (Supplementary Fig. 3) we were concerned to establish the independence of our  
 57 activations from the type of onset function (stick vs. epoch) we used in our fMRI model  
 58 (cf. Grinband et al., 2008). To test this we constructed a second design matrix (“epoch”)  
 59 that modulated the duration of the stimulus-locked cost regressors (FV, NV, HV) as a  
 60 function of trial-by-trial RT. This model produced very similar activations for the COST  
 61 > NEUTRAL contrast when compared to the “stick” model reported in the main text;  
 62 specifically, in left ventrolateral prefrontal cortex (vlPFC), insula, left superior parietal  
 63 lobule (SPL) and bilateral frontal eye fields (FEF). Activation maps from both models  
 64 (thresholded at  $T > 3$ ) are shown here overlaid on sagittal and coronal sections for  
 65 comparison.

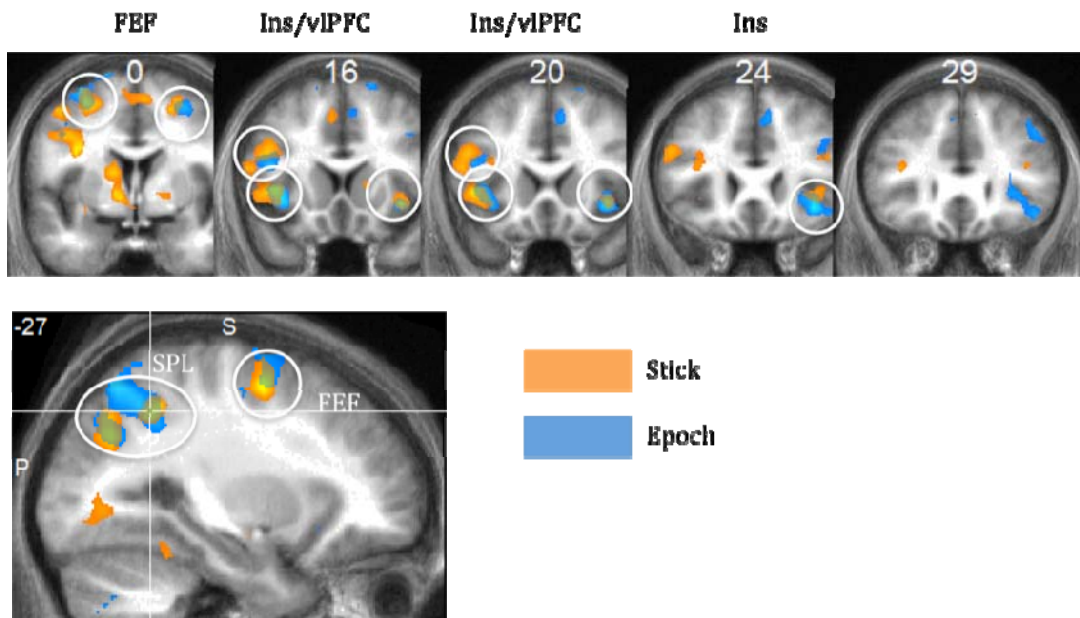



67 **Supplementary Table 1**

68 Regressors entered into the general linear model (GLM). Abbreviations: FV – face  
 69 value; NV – neutral value; HV – house value; “f” – face decision; “h” house decision;  
 70 R – right button press; L – left button press orth. – orthogonalised; wrt – with respect to.

71

| <b>Onset</b>                | <b>Condition</b> | <b>Parametric modulator</b>                  |
|-----------------------------|------------------|----------------------------------------------|
| Cost cue                    | -                | -                                            |
| Stimulus (face/house image) | FV               | <i>CP</i><br><i>U</i> (orth. wrt <i>CP</i> ) |
|                             | NV               | <i>CP</i><br><i>U</i> (orth. wrt <i>CP</i> ) |
|                             | HV               | <i>CP</i><br><i>U</i> (orth. wrt <i>CP</i> ) |
| Response                    | FV, “f”, L       | -                                            |
|                             | FV, “f”, R       | -                                            |
|                             | FV, “h”, L       | -                                            |
|                             | FV, “h”, R       | -                                            |
|                             | NV, “f”, L       | -                                            |
|                             | NV, “f”, R       | -                                            |
|                             | NV, “h”, L       | -                                            |
|                             | NV, “h”, R       | -                                            |
|                             | HV, “f”, L       | -                                            |
|                             | HV, “f”, R       | -                                            |
|                             | HV, “h”, L       | -                                            |
|                             | HV, “h”, R       | -                                            |
| Feedback screen             | -                | Monetary loss on previous mini-block         |

72

73 **Supplementary Table 2**

74 Summary of activations following exclusive masking for either cost or uncertainty-  
 75 related activity. These clusters were obtained by masking out areas that are active in the  
 76 alternative contrast at a liberal threshold of  $P < 0.05$ , uncorrected. Remaining significant  
 77 activations reflect BOLD signal changes in regions that do not differ in the alternative  
 78 contrast. Abbreviations: FEF – frontal eye fields; pMTG – posterior middle temporal  
 79 gyrus; dMFC – dorsal medial frontal cortex; STN – subthalamic nucleus.

80

| <b>Contrast</b>                         | <b>Voxels</b> | <b>Z-score</b> | <b>P value (cluster FWE corrected)</b> | <b>Peak voxel MNI coordinates</b> | <b>Laterality</b> | <b>Label</b>                 |
|-----------------------------------------|---------------|----------------|----------------------------------------|-----------------------------------|-------------------|------------------------------|
| [(FV + HV) > NV] ex. masked by <i>U</i> | 35            | 4.56           | 0.013                                  | -27, -3, 54                       | L                 | FEF                          |
|                                         | 93            | 4.28           | < 0.001                                | 15, -18, 0                        | L                 | Caudate/<br>Thalamus/<br>STN |
|                                         | 42            | 4.10           | < 0.001                                | 27, -9, 54                        | R                 | FEF                          |
|                                         | 43            | 4.04           | < 0.001                                | -36, -72, 21                      | L                 | pMTG                         |
|                                         | 29            | 3.90           | 0.035                                  | 36, 15, -6                        | R                 | Insula                       |
| <i>U</i> ex. masked by [(FV + HV) > NV] | 35            | 3.54           | 0.027                                  | 9, 12, 48                         | R/L               | dMFC                         |

81

82
